# Supplementary material for: Statin-induced microRNAome alterations modulating inflammation pathways of peripheral blood mononuclear cells in patients with hypercholesterolemia
Source: Oxford University Press journal article supplement (doi:10.1042/bsr20201885), 2020-09-01
Supplement: bsr-2020-1885_supp.pdf [file bsr-2020-1885_supp.pdf]

**Supplemental Table 1.** Baseline clinical features and laboratory measurements before and after statin treatment stratified by statin types.

|                                               | Pitavastatin |          | Atorvastatin |          |
|-----------------------------------------------|--------------|----------|--------------|----------|
|                                               | (n=19)       |          | (n=15)       |          |
|                                               | Before Tx    | After Tx | Before Tx    | After Tx |
| Age, mean (SD), years                         | 65.7 (5.5)   |          | 61.1 (6.2)   |          |
| Female, n (%)                                 | 6 (31.6)     |          | 1 (6.7)      |          |
| Body mass index, mean (SD), kg/m <sup>2</sup> | 26.1 (3.2)   |          | 27.6 (4.3)   |          |
| Systolic blood pressure, mean (SD), mmHg      | 126.7 (8.4)  |          | 123.1 (8.5)  |          |
| Diastolic blood pressure, mean (SD), mmHg     | 76.7 (7.8)   |          | 76.0 (6.8)   |          |
| Medical history                               |              |          |              |          |
| Coronary heart disease, n (%)                 | 8 (42.1)     |          | 11 (73.3)    |          |
| Diabetes mellitus, n (%)                      | 14 (73.7)    |          | 7 (46.7)     |          |
| Hypertension, n (%)                           | 19 (100.0)   |          | 13 (86.7)    |          |
| Current smoker, n (%)                         | 2 (10.5)     |          | 3 (20.0)     |          |
| Laboratory data                               |              |          |              |          |

|                                                  |              |               |              |              |
|--------------------------------------------------|--------------|---------------|--------------|--------------|
| Hemoglobin, mean (SD), g/dL                      | 14.7 (1.1)   | 14.7 (1.2)    | 15.1 (1.2)   | 15.1 (1.1)   |
| Platelet, mean (SD), 10 <sup>3</sup> /□L         | 215.7 (57.8) | 218.8 (60.8)  | 230.2 (61.5) | 226.9 (59.1) |
| White blood cell, mean (SD), 10 <sup>3</sup> /mL | 5.6 (1.2)    | 5.8 (1.5)     | 6.3 (1.3)    | 6.9 (1.6)    |
| Neutrophil, mean (SD), %                         | 54.7 (8.9)   | 55.5 (8.8)    | 54.5 (7.4)   | 58.5 (7.4)   |
| Lymphocyte, mean (SD), %                         | 35.8 (7.7)   | 34.8 (7.2)    | 36.1 (7.2)   | 32.2 (6.6)   |
| Monocyte, mean (SD), %                           | 5.8 (1.5)    | 6.1 (1.7)     | 5.4 (0.9)    | 5.3 (1.0)    |
| AST, mean (SD), U/L                              | 29.1 (10.0)  | 28.7 (10.2)   | 29.7 (7.5)   | 29.8 (14.3)  |
| ALT, mean (SD), U/L                              | 31.0 (17.0)  | 31.7 (17.4)   | 38.7 (19.1)  | 38.7 (20.6)  |
| CPK, mean (SD), U/L                              | 127.8 (75.8) | 249.6 (552.2) | 138.0 (77.7) | 151.7 (86.9) |
| Fasting glucose, mean (SD), mg/dL                | 123.3 (27.2) | 130.4 (43.8)  | 109.4 (19.7) | 112.8 (25.1) |
| HbA1c, mean (SD), %                              | 6.8 (0.8)    | 6.7 (0.9)     | 6.5 (1.1)    | 6.5 (1.2)    |
| CRP, mean (SD), mg/dL                            | 0.10 (0.17)  | 0.06 (0.09)   | 0.22 (0.30)  | 0.34 (0.60)  |
| Lipid profile                                    |              |               |              |              |
| Total cholesterol, mean (SD), mg/dL              | 233.9 (31.8) | 172.8 (32.0)  | 239.6 (33.2) | 165.1 (41.5) |
| Triglyceride, mean (SD), mg/dL                   | 152.3 (40.1) | 118.8 (42.4)  | 191.9 (67.6) | 138.3 (51.3) |
| HDL cholesterol, mean (SD), mg/dL                | 50.9 (10.5)  | 52.0 (12.1)   | 49.4 (12.6)  | 45.7 (10.0)  |

|                                   |              |              |              |              |
|-----------------------------------|--------------|--------------|--------------|--------------|
| LDL cholesterol, mean (SD), mg/dL | 164.7 (29.4) | 110.3 (35.2) | 164.6 (28.0) | 105.7 (40.4) |
|-----------------------------------|--------------|--------------|--------------|--------------|

---

Abbreviations: ALT: alanine aminotransferase; AST: aspartate aminotransferase; CPK: creatine phosphokinase; CRP: C-reactive protein; HDL-C: high-density-lipoprotein cholesterol; LDL-C: low-density-lipoprotein cholesterol; SD: standard deviation; Tx: treatment.

**Supplemental Table 2.** Reference sequences of microRNAs used for quantitative polymerase chain reaction (qPCR) validation.

| <b>Microarray-selected miRNA</b> | <b>Reference sequence</b>  |
|----------------------------------|----------------------------|
| hsa-miR-483-5p                   | AAGACGGGAGGAAAGAAGGGAG     |
| hsa-miR-4667-5p                  | ACUGGGGAGCAGAAGGAGAACC     |
| hsa-miR-1244                     | AAGUAGUUGGUUUGUAUGAGAUGGUU |
| hsa-miR-3921                     | UCUCUGAGUACCAUAUGCCUUGU    |
| hsa-miR-455-3p                   | GCAGUCCAUGGGCAUAUACAC      |
| hsa-miR-3609                     | CAAAGUGAUGAGUAAUACUGGCUG   |
| hsa-miR-4428                     | CAAGGAGACGGGAACAUGGAGC     |
| hsa-miR-3128                     | UCUGGCAAGUAAAAAACUCUCAU    |
| hsa-miR-27a-5p                   | AGGGCUUAGCUGCUUGUGAGCA     |
| hsa-miR-4454                     | GGAUCCGAGUCACGGCACCA       |

Abbreviations: miRNA, microRNA; qPCR, quantitative polymerase chain reaction.

**Supplemental Table 3.** Targeted genes of miR-483 and their normalized expressions in peripheral blood mononuclear cells (PBMCs) according to the miRSystem platform and the Human Protein Atlas

| <b>Targeted gene</b> | <b>Gene description</b>                                                                  | <b>Normalized expression<br/>in PBMC</b> |
|----------------------|------------------------------------------------------------------------------------------|------------------------------------------|
| RHOA                 | ras homolog family member A                                                              | 151.5                                    |
| CTDSPL2              | CTD (carboxy-terminal domain, RNA polymerase II, polypeptide A) small phosphatase like 2 | 11.2                                     |
| ELK1                 | ELK1, member of ETS oncogene family                                                      | 6.3                                      |
| NDRG2                | NDRG family member 2                                                                     | 4.0                                      |
| PRPF4B               | pre-mRNA processing factor 4B                                                            | 3.9                                      |
| CXXC5                | CXXC finger protein 5                                                                    | 3.4                                      |
| CPNE5                | copine V                                                                                 | 2.2                                      |
| NUDT8                | nudix (nucleoside diphosphate linked moiety X)-type motif 8                              | 2.1                                      |
| FAM160B2             | family with sequence similarity 160, member B2                                           | 2.1                                      |
| SLC12A5              | solute carrier family 12 (potassium/chloride transporter), member 5                      | 1.3                                      |
| MARCKSL1             | MARCKS-like 1                                                                            | 1.2                                      |

|         |                                                              |     |
|---------|--------------------------------------------------------------|-----|
| NFIX    | nuclear factor I/X (CCAAT-binding transcription factor)      | 0.5 |
| SOX11   | SRY (sex determining region Y)-box 11                        | 0.5 |
| HAND2   | heart and neural crest derivatives expressed 2               | 0.0 |
| PAX2    | paired box 2                                                 | 0.0 |
| LDLRAD2 | low density lipoprotein receptor class A domain containing 2 | 0.0 |
| RNF165  | ring finger protein 165                                      | 0.0 |

---
